# Supplementary material for: The impact of electrolytic pH on photoelectrochemical water oxidation
Source: Royal Society of Chemistry journal article supplement (doi:10.1039/d2ra07271h), 2023-01-01
Supplement: d2ra07271h1.pdf [file d2ra07271h1.pdf]

## ARTICLE

### Supporting Information

## The impact of electrolytic pH on photoelectrochemical water oxidation

Neeraj Kumar Biswas<sup>a,b,c</sup>, Anupam Srivastav<sup>b</sup>, Sakshi Saxena<sup>b,d</sup>, Anuradha Verma<sup>b</sup>, Runjhun Dutta<sup>b</sup>, Manju Srivastava<sup>b</sup>, Sumant Upadhyay<sup>e</sup>, Vibha Rani Satsangif, Rohit Shrivastav<sup>b</sup>, Sahab Dass<sup>\*a</sup>

- Department for Continuing Education, University of Oxford, Rewley House, 1 Wellington Square, Oxford, OX1 2JA, UK.
- Department of Chemistry, Faculty of Science, Dayalbagh Educational Institute Agra, 282005, India.  
\*E-mail: [sahabdas@dei.ac.in](mailto:sahabdas@dei.ac.in), [drsahabdas@gmail.com](mailto:drsahabdas@gmail.com)
- School of Foreign Languages, Indira Gandhi National Open University, Maidan Garhi, New Delhi - 110068 India.
- Mangalayatan University, Beswan, Aligarh, Uttar Pradesh, India.
- Amity University, Noida Campus, Sector 125, Noida, 201313, Uttar Pradesh, India.
- Department of Physics, Faculty of Science, Dayalbagh Educational Institute Agra, 282005, India.

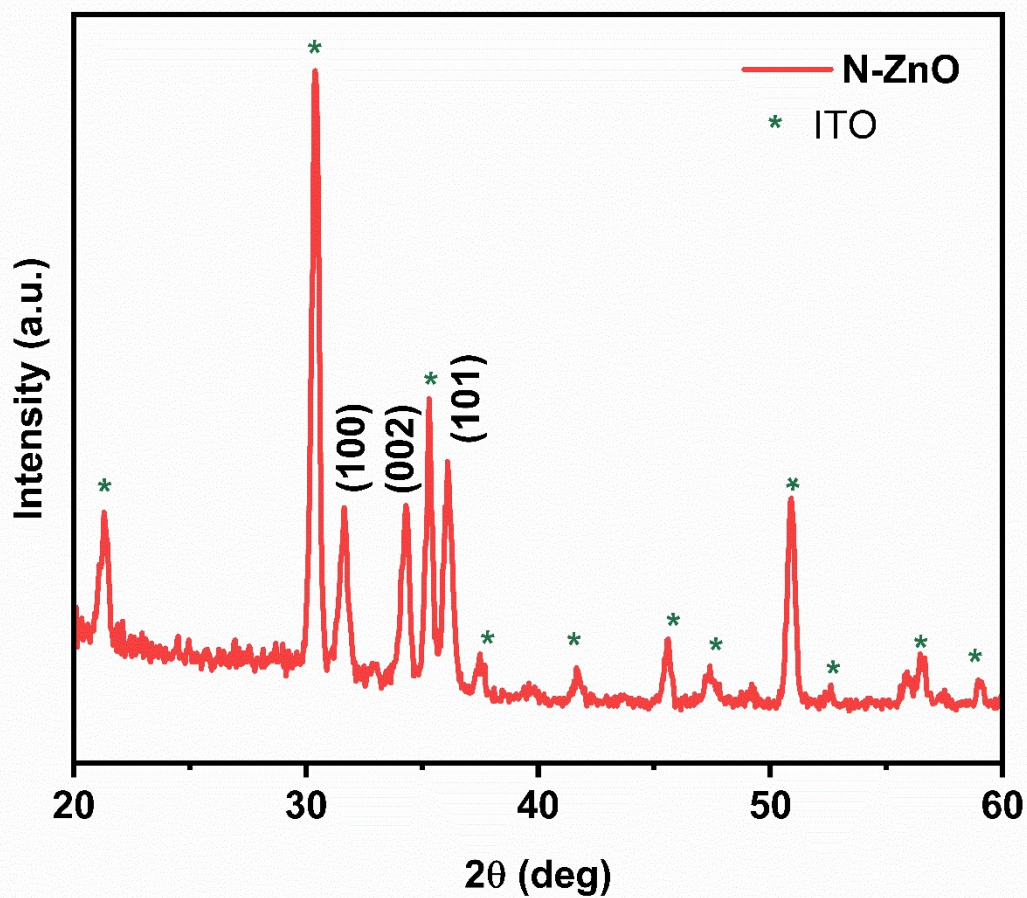

Fig. S1. XRD pattern for nanostructured N-ZnO.

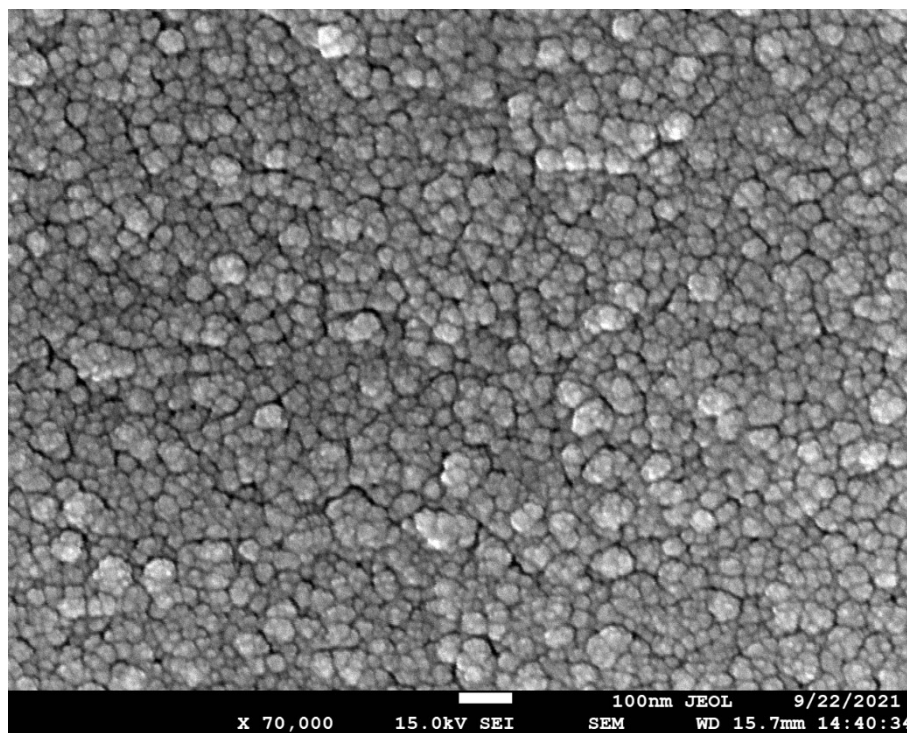

**Fig. S2.** FESEM image of nanostructured N-ZnO at 100 nm scale.

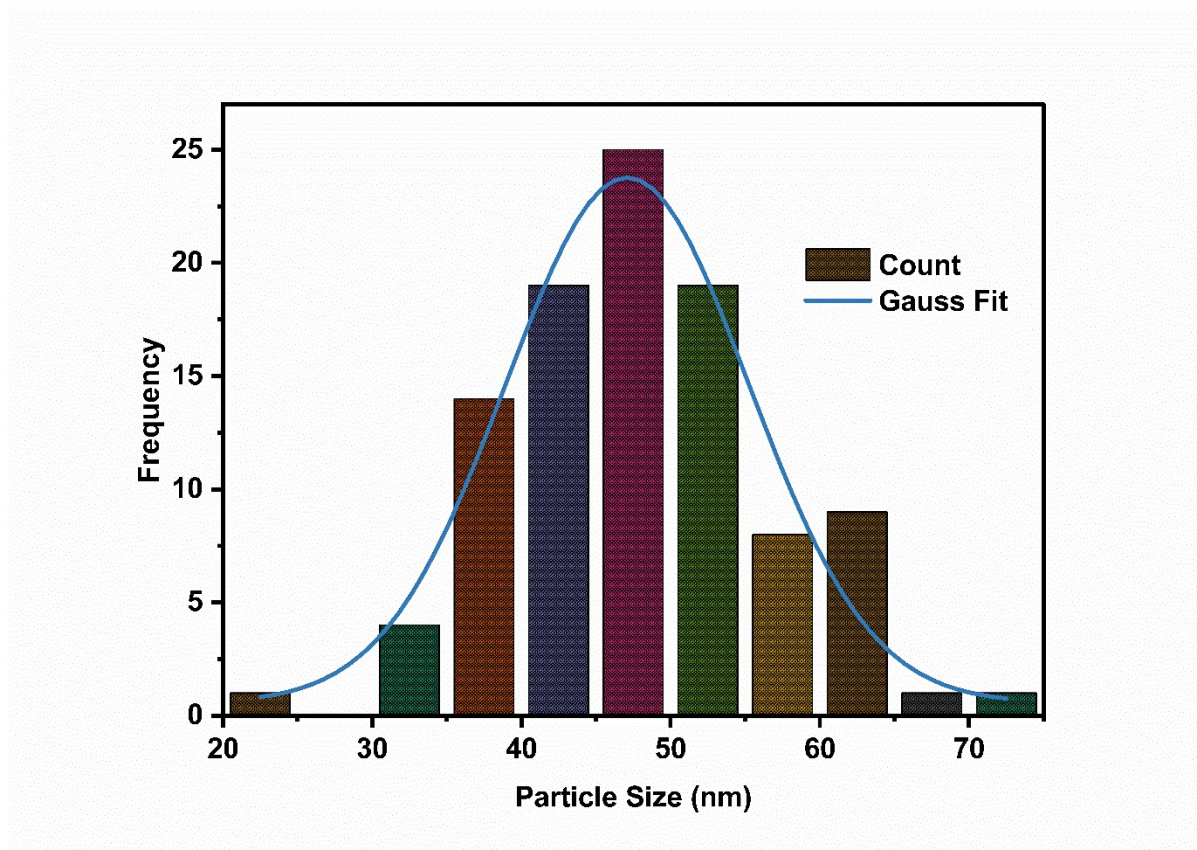

**Fig. S3.** Gaussian fitting curve of diameter distribution for nanostructured N-ZnO.

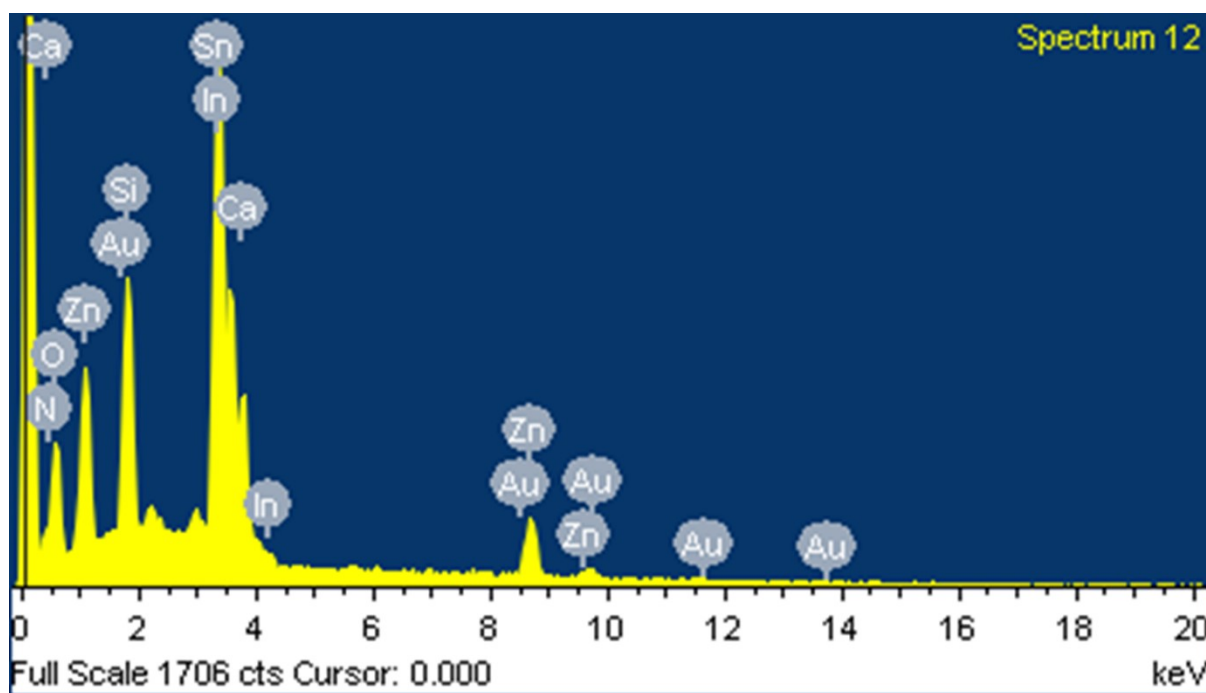

**Fig. S4.** EDAX spectrum of nanostructured N-ZnO

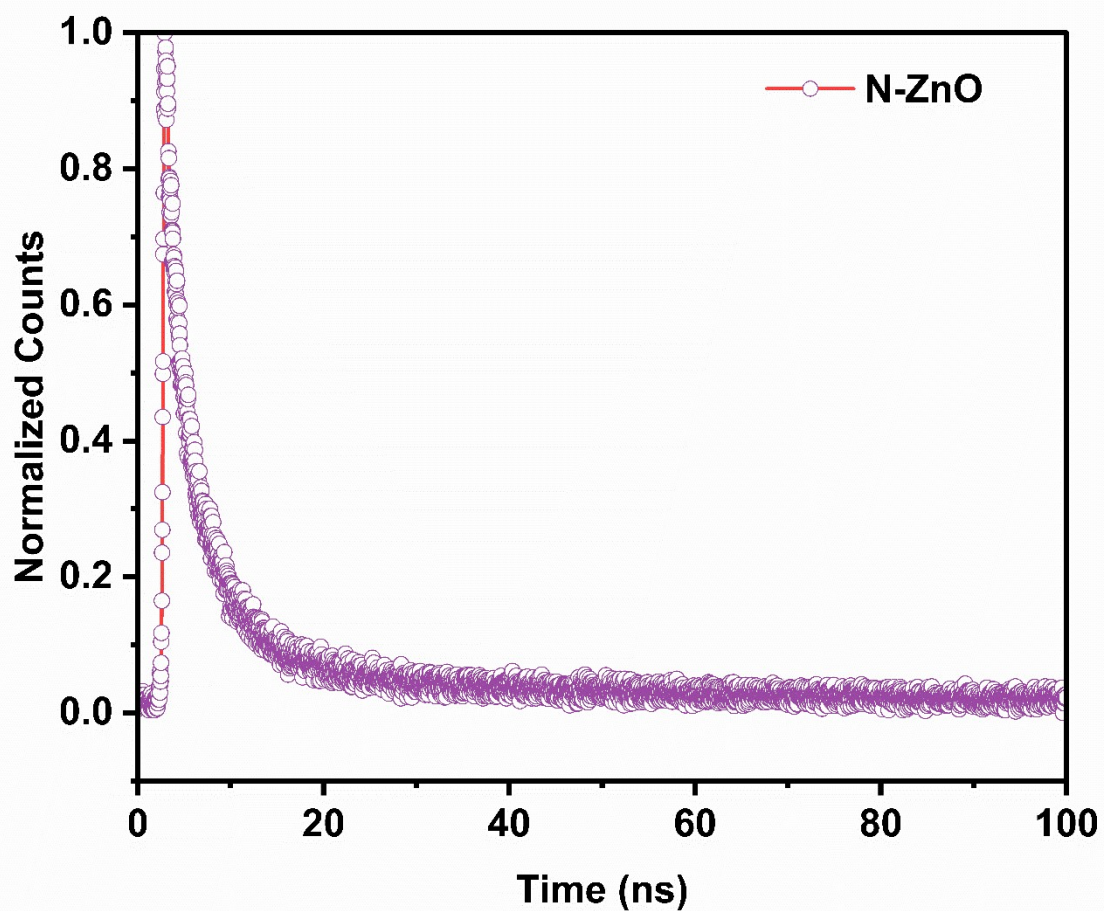

Fig. S5. Photoluminescence (PL) lifetime spectrum of nanostructured N-ZnO.

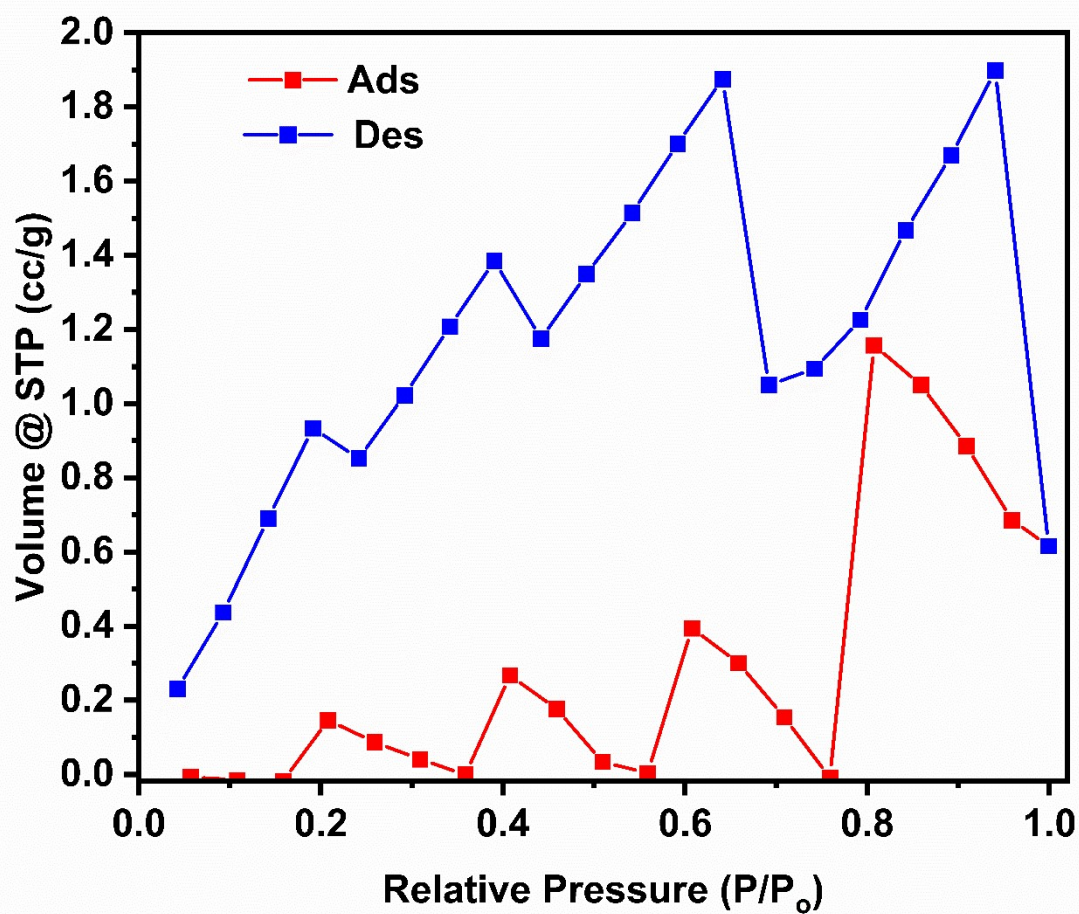

Fig. S6. BET analysis of nanostructured N-ZnO.

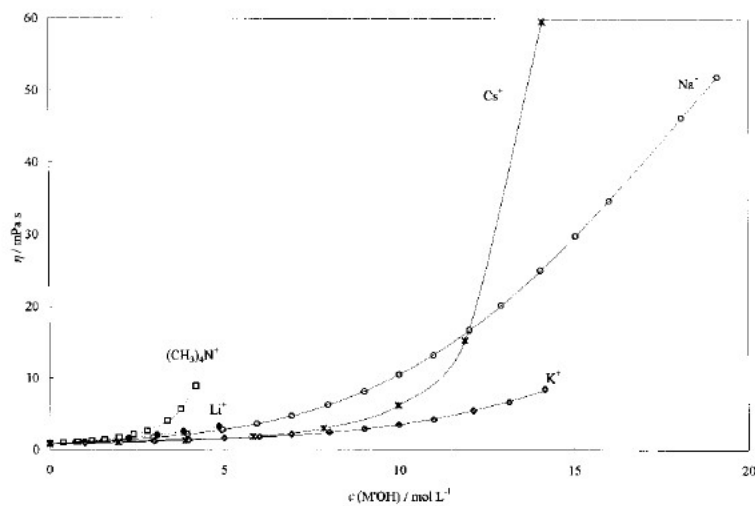

**Fig. S7.** Viscosities,  $\eta$ , of  $M'OH$  ( $M=K, Na, Cs$ , and TMA) solutions at 25.0 °C as a function of the molar concentration,  $c$ .<sup>1</sup> [Copyright © 2000, American Chemical Society]



**Table S1.** Element composition of nanostructured N-ZnO

| <b>Element</b> | <b>Weight%</b> | <b>Atomic%</b> |
|----------------|----------------|----------------|
| <b>N K</b>     | 13.55          | 24.28          |
| <b>O K</b>     | 37.17          | 58.32          |
| <b>Si K</b>    | 7.19           | 6.42           |
| <b>Ca K</b>    | 1.98           | 1.24           |
| <b>Zn K</b>    | 6.01           | 2.31           |
| <b>In L</b>    | 31.45          | 6.87           |
| <b>Sn L</b>    | 2.66           | 0.56           |
| <b>Totals</b>  | 100.00         | 100.00         |

**Table S2.** Molar ratio of electrolytes at different pH

| pH | Molar Concentration |           |
|----|---------------------|-----------|
|    | KOH                 | NaOH      |
| 9  | 0.00001 M           | 0.00001 M |
| 10 | 0.0001 M            | 0.0001 M  |
| 11 | 0.001 M             | 0.001 M   |
| 12 | 0.01 M              | 0.01 M    |
| 13 | 0.1 M               | 0.1 M     |
| 14 | 1.0 M               | 1.0 M     |

**References**

- 1 P. M. Sipos, G. Hefter and P. M. May, *Journal of Chemical & Engineering Data*, 2000, **45(4)**, 613-617.
